# Supplementary material for: Reduction in Arsenic Exposure by Domestic Water Purification Devices in Shanghai Area and Related Health Risk Assessment
Source: MDPI journal article supplement (doi:10.3390/w13202916), 2021-10-16
Supplement: s1 [file s1]

# Supporting Information

## Reduction in Arsenic Exposure by Domestic Water Purification Devices in Shanghai Area and Related Health Risk Assessment

Qin Qin <sup>1,2,3</sup>, Hongtao Lu <sup>4</sup>, Zhiliang Zhu <sup>1,2,\*</sup>, Minghao Sui <sup>1</sup>, Yanling Qiu <sup>1,2</sup> and Daqiang Yin <sup>2</sup>

<sup>1</sup> State Key Laboratory of Pollution Control and Resources Reuse, College of Environmental Science and Engineering, Tongji University, Shanghai 200092, China; 1910580@tongji.edu.cn (Q.Q.); minghaosui@tongji.edu.cn (M.S.)

<sup>2</sup> Key Laboratory of Yangtze River Water Environment of the Ministry of Education, College of Environmental Science and Engineering, Tongji University, Shanghai 200092, China; yindq@tongji.edu.cn

<sup>3</sup> CCIC, Physical and chemical testing CO, LTD, Shanghai 200436, China

<sup>4</sup> Shanghai Urban Construction Vocational College, Shanghai 200438, China; luhongtao@succ.edu.cn

\* Correspondence: zzl@tongji.edu.cn

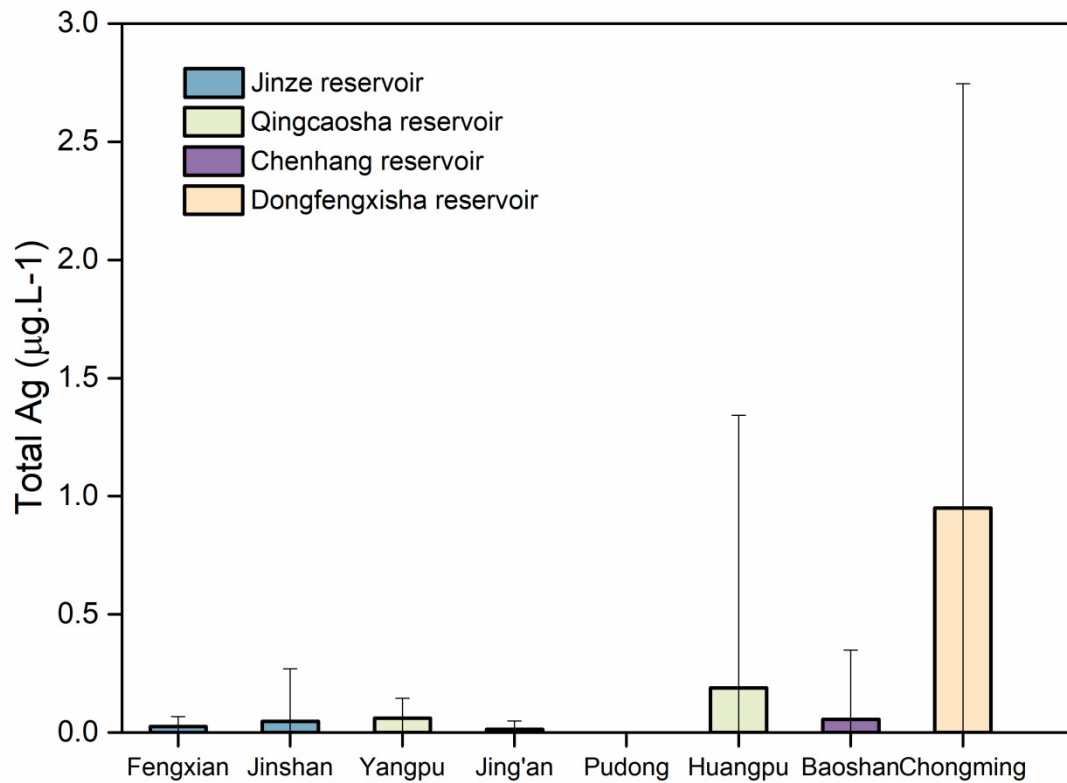

**Figure S1.** Distribution of total Ag in the end water of Shanghai pipeline network.

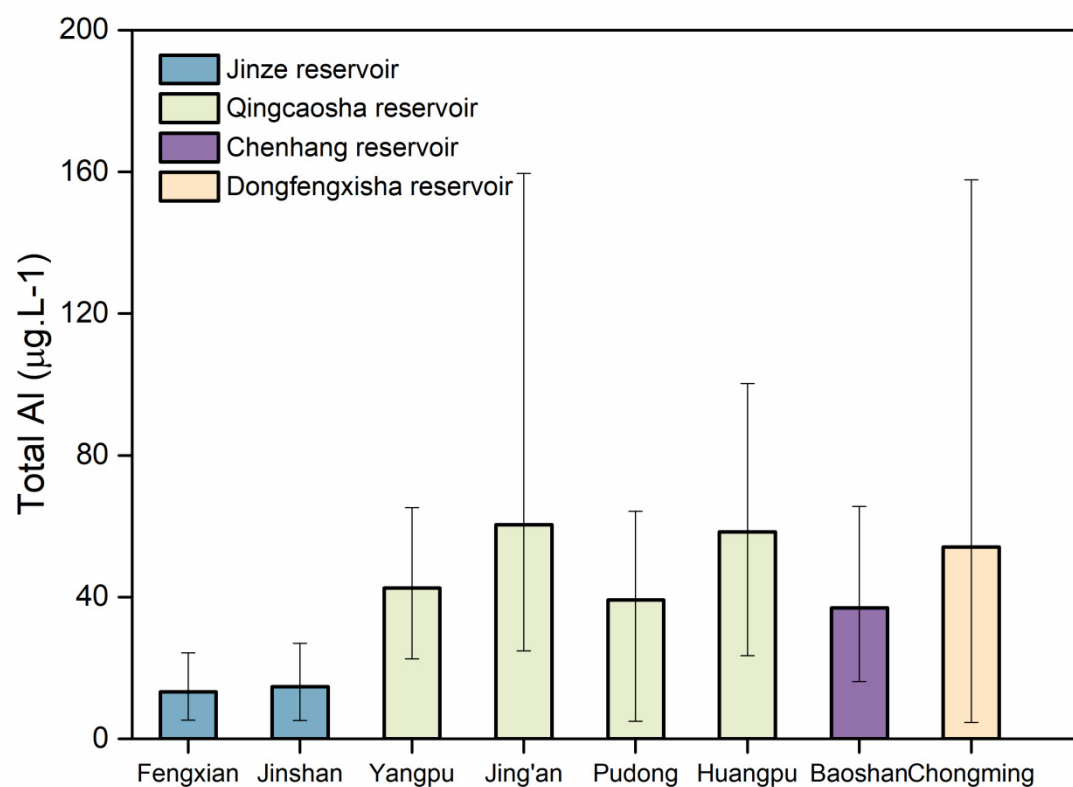

**Figure S2.** Distribution of total Al in the end water of Shanghai pipeline network.

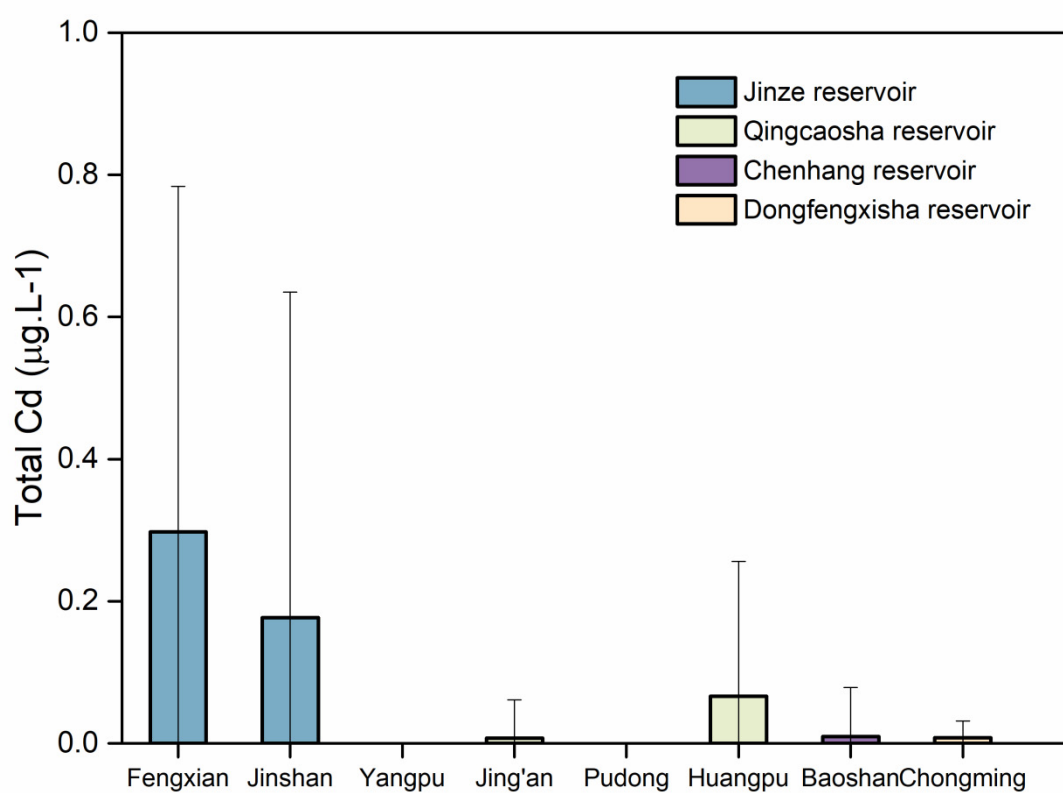

**Figure S3.** Distribution of total Cd in the end water of Shanghai pipeline network.

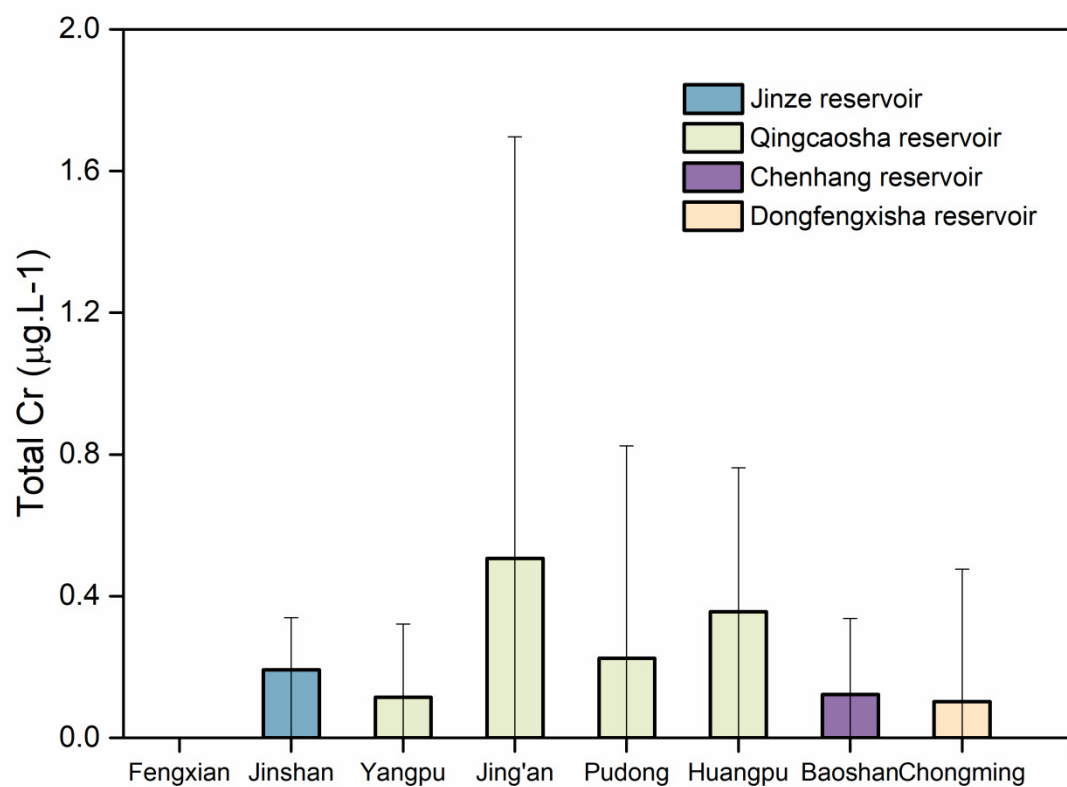

**Figure S4.** Distribution of total Cr in the end water of Shanghai pipeline network.

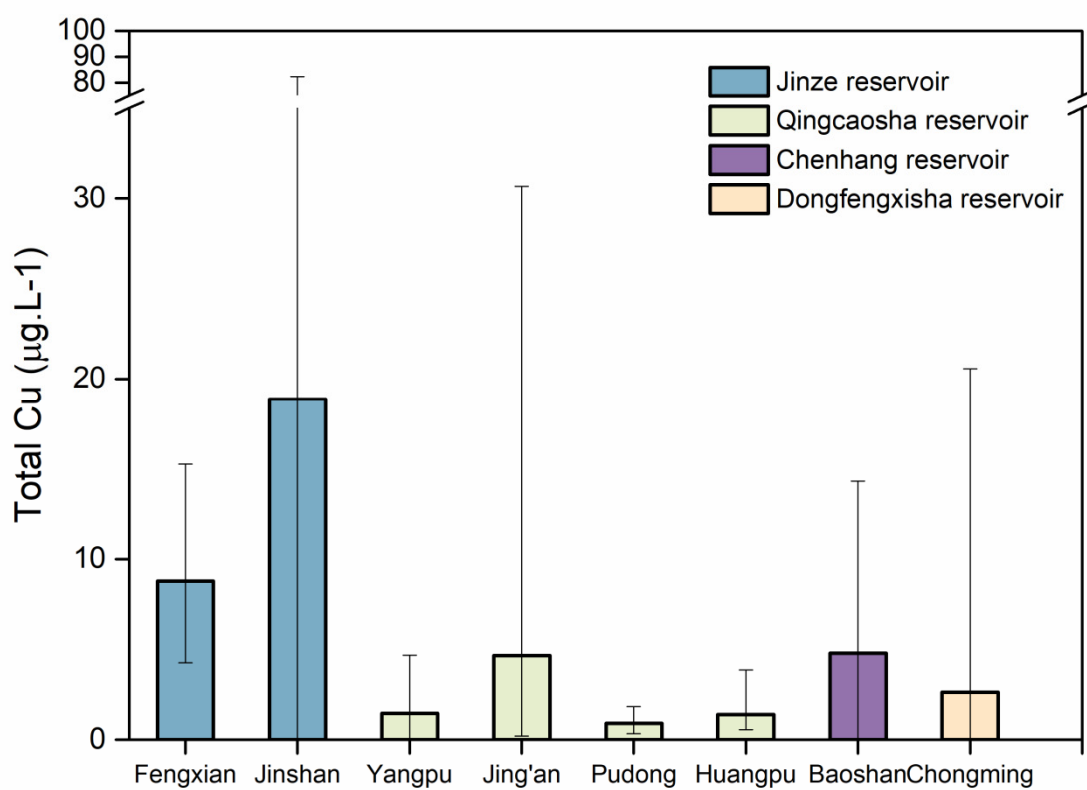

**Figure S5.** Distribution of total Cu in the end water of Shanghai pipeline network.

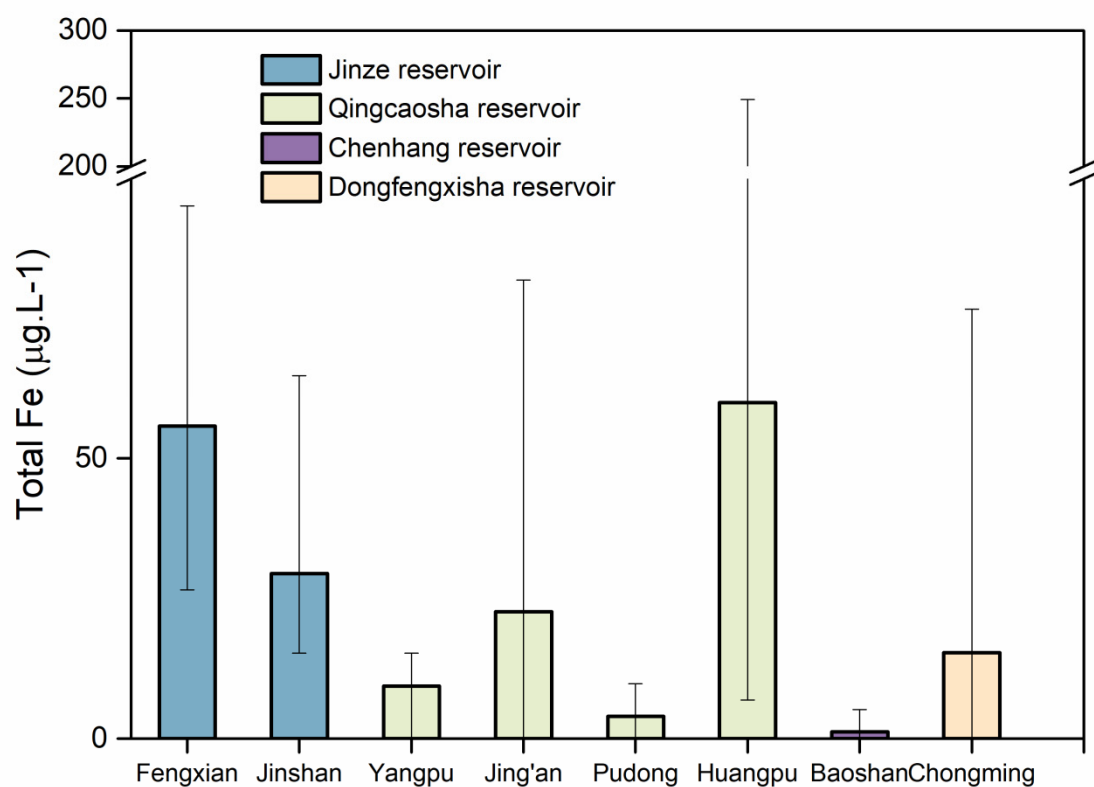

**Figure S6.** Distribution of total Fe in the end water of Shanghai pipeline network.

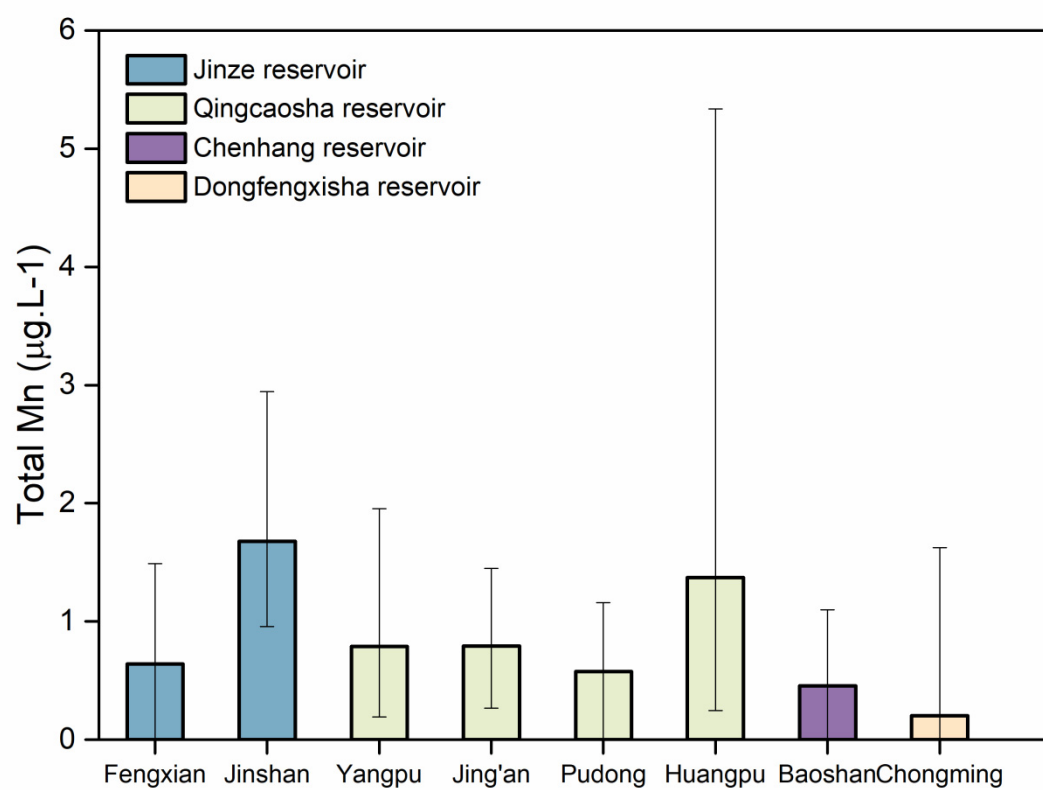

**Figure S7.** Distribution of total Mn in the end water of Shanghai pipeline network.

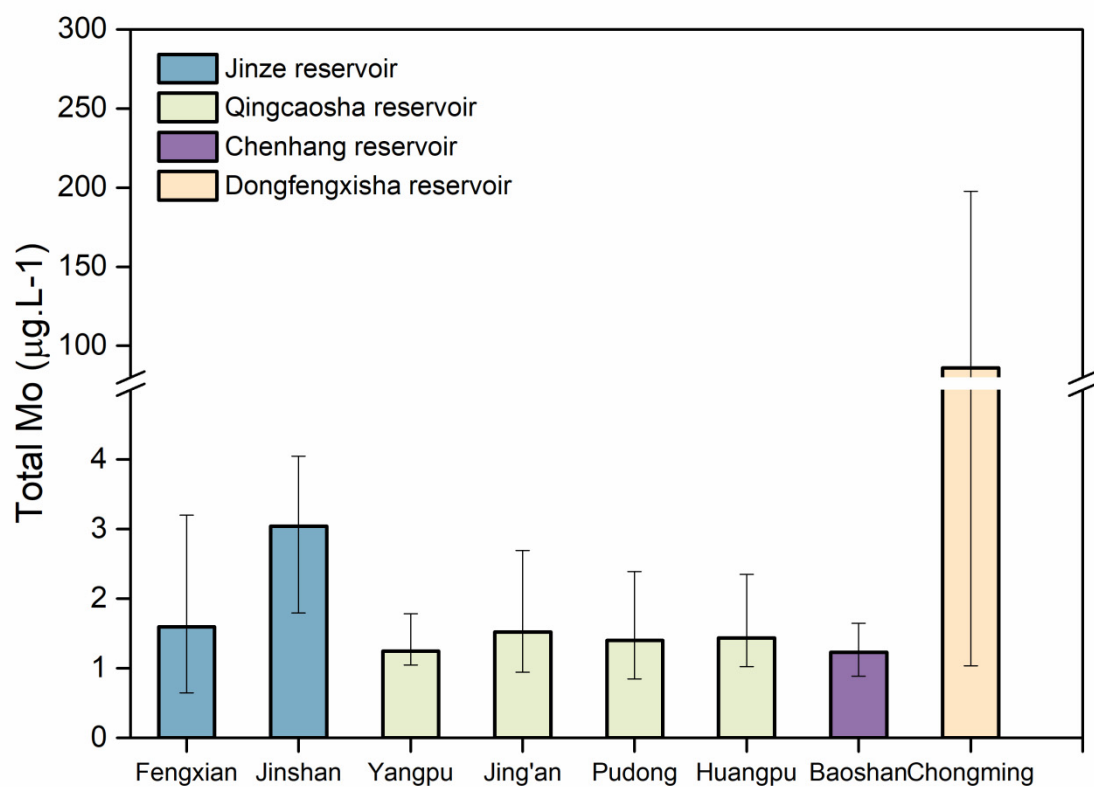

**Figure S8.** Distribution of total Mo in the end water of Shanghai pipeline network.

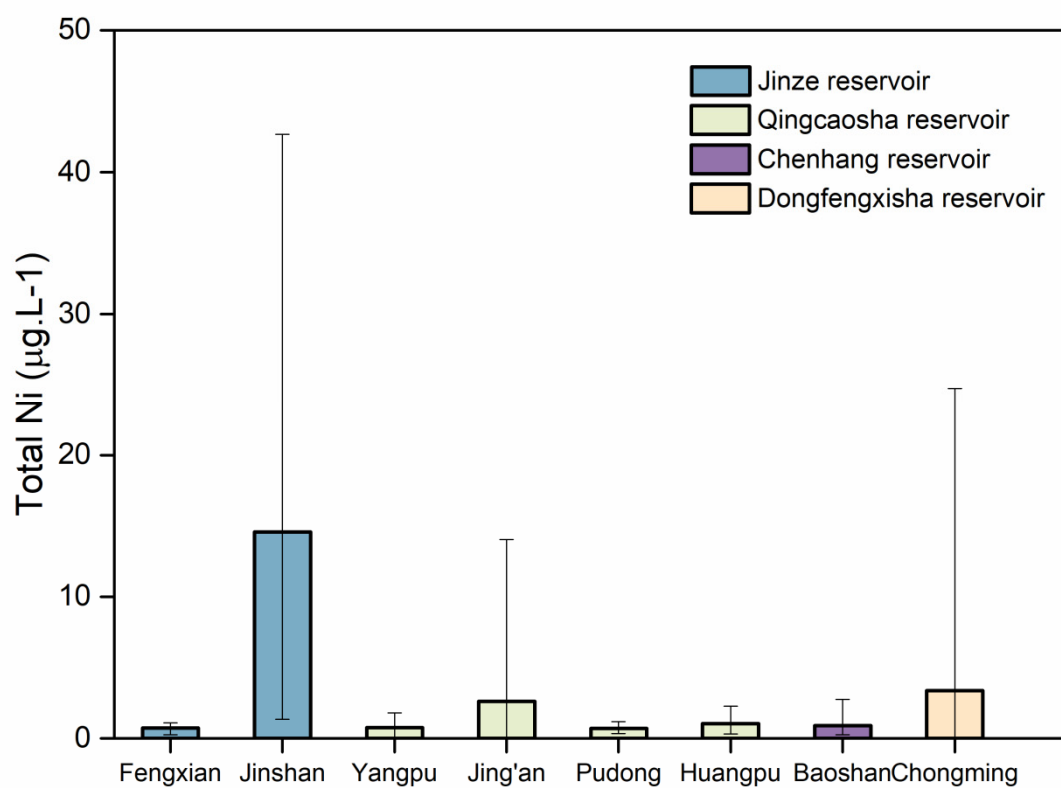

**Figure S9.** Distribution of total Ni in the end water of Shanghai pipeline network.

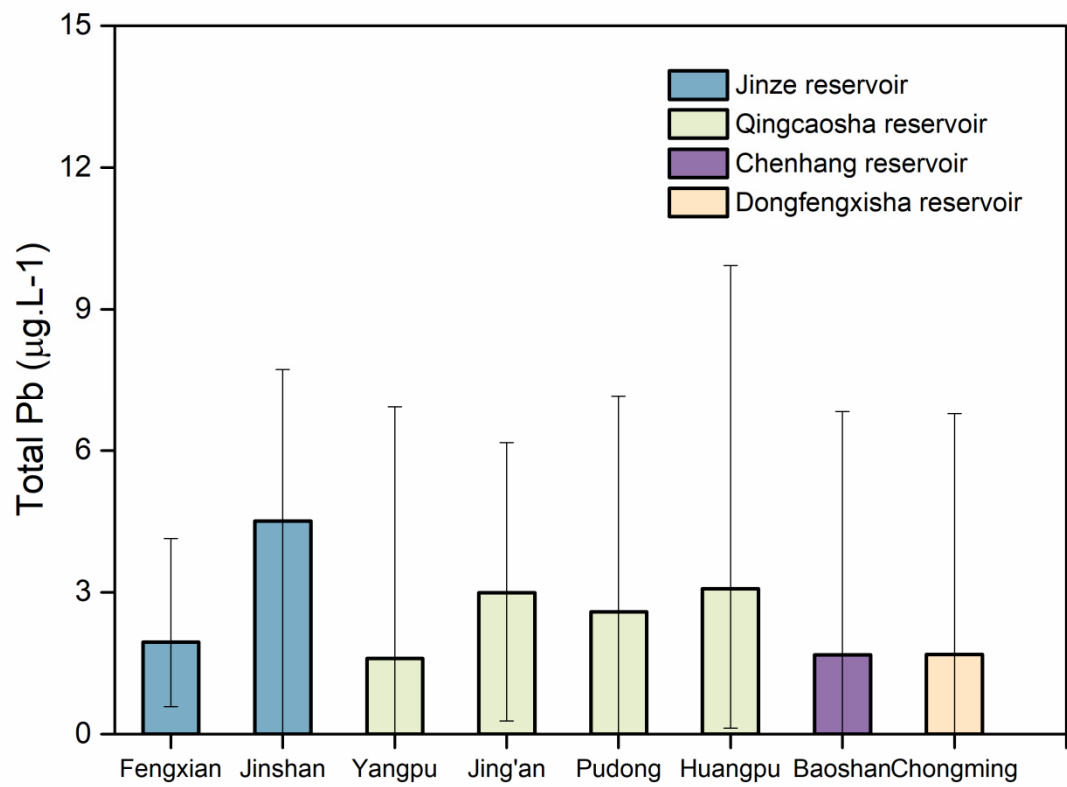

**Figure S10.** Distribution of total Pb in the end water of Shanghai pipeline network.

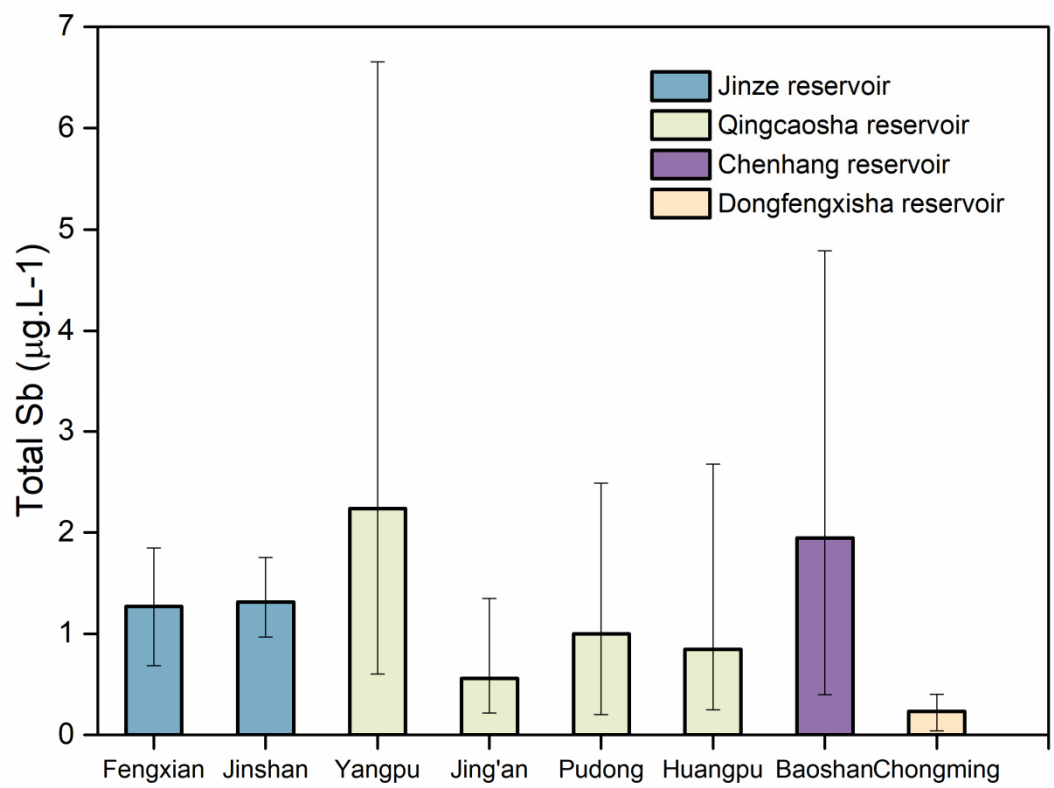

**Figure S11.** Distribution of total Sb in the end water of Shanghai pipeline network.

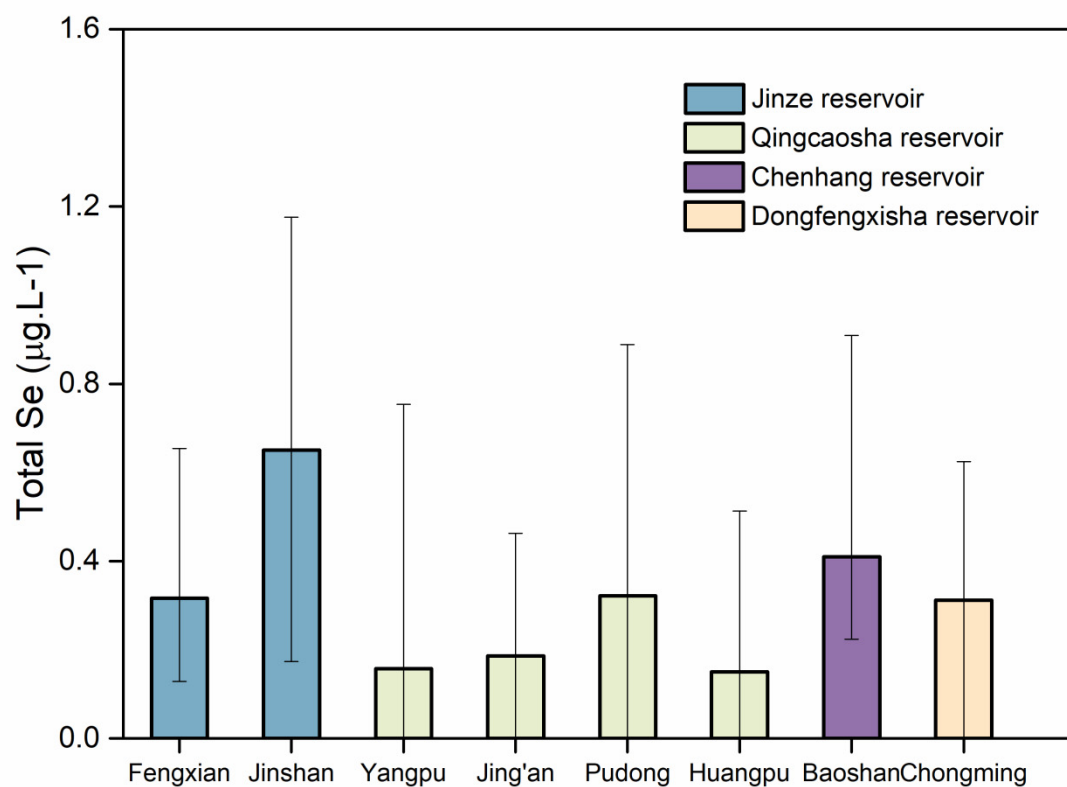

**Figure S12.** Distribution of total Se in the end water of Shanghai pipeline network.

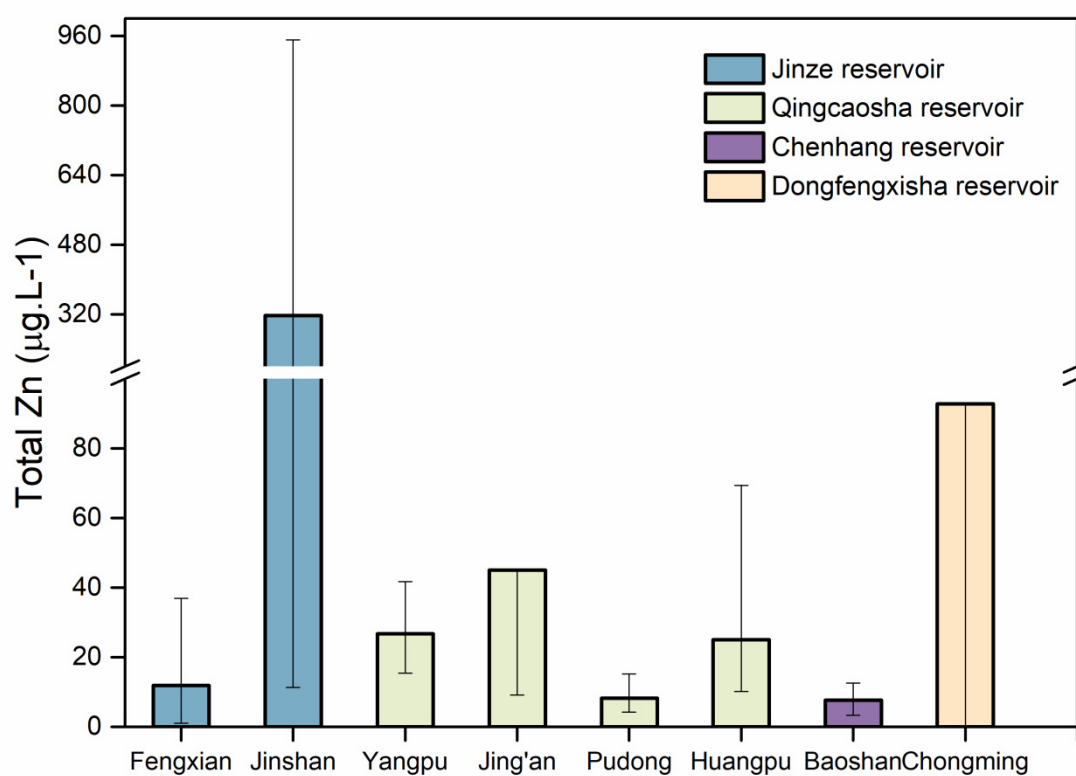

**Figure S13.** Distribution of total Zn in the end water of Shanghai pipeline network.

**Table S1** General filter elements and related technical parameters of water purifiers in market.

| Filter element of water purifier | Brief description                                                               | Modes                     | Technical data                                                                           | Standards                                               |
|----------------------------------|---------------------------------------------------------------------------------|---------------------------|------------------------------------------------------------------------------------------|---------------------------------------------------------|
| Polypropylene                    | Made from non-toxic polypropylene                                               | Coarse filtering          | Filtration accuracy 5 $\mu$ m.                                                           | GB/T 30306<br>GB/T 17219                                |
| Activated carbon                 | Granular activated carbon and sintered activated carbon                         | Adsorption and filtration | Iodine adsorption value, methylene blue adsorption value, intensity and other indicators | GB/T 13803.2<br>GB/T 7701.2<br>GB/T 30306<br>GB/T 17219 |
| Hollow fibre ultrafiltration     | Filtration accuracy 0.1–0.01 $\mu$ m.                                           | Filtration                | pH value, working pressure, working temperature, retention rate                          | HY/T 062<br>HY/T 112                                    |
| Nanofiltration                   | Filtration accuracy 1nm                                                         | Filtration                | Monovalent ion removal rate, divalent ion removal rate, water recovery rate              | HY/T 113<br>HY/T 114                                    |
| Reverse osmosis                  | Rolled polyamide composite reverse osmosis membranes, Filtration accuracy 0.1nm | Filtration                | Desalination rate                                                                        | GB/T 34241                                              |
| Post-activated carbon (T33)      | Granular activated carbon                                                       | Adsorption and filtration | Iodine adsorption value, methylene blue adsorption value, intensity and other indicators | GB/T 13803.2<br>GB/T 7701.2<br>GB/T 30306<br>GB/T 17219 |

**Table S2** The technical parameters of the three water purifiers.

| Three types of water purifies                                                                                                                                                                                      | Filter elements at all levels | Technical parameters                                                                                                                             |
|--------------------------------------------------------------------------------------------------------------------------------------------------------------------------------------------------------------------|-------------------------------|--------------------------------------------------------------------------------------------------------------------------------------------------|
| Ultrafiltration water purifier from manufacturer C                                                                                                                                                                 | Polypropylene cotton filter   | Length=254 mm<br>Filtering accuracy=10 $\mu$ m<br>pH scope=1–13<br>Pressure inlet= 0.1–0.4 Mpa<br>Pressure drop $\leq$ 0.2 Mpa                   |
| Stages=4<br>Pressure inlet= 0.1–0.4Mpa<br>Temperature=4–38 $^{\circ}$ C<br>Influent quality=top water (GB5749)<br>Purified water flow=0.12 m <sup>3</sup> h <sup>-1</sup><br>Total purified water=2 m <sup>3</sup> | Granular activated carbon     | Nutshell Activated Carbon<br>Length=254 mm<br>Filtering accuracy=5 $\mu$ m<br>Pressure inlet $\leq$ 1Mpa<br>Iodine adsorption value=800–1000mg/g |



|                                                                                                                                                                                                                                                                                           |                                    |                                                                                                                                                                                                                                                                                                                                                  |
|-------------------------------------------------------------------------------------------------------------------------------------------------------------------------------------------------------------------------------------------------------------------------------------------|------------------------------------|--------------------------------------------------------------------------------------------------------------------------------------------------------------------------------------------------------------------------------------------------------------------------------------------------------------------------------------------------|
| <p>Nanofiltration water purifier from manufacturer B</p> <p>Stages=4</p> <p>Pressure inlet= 0.1–0.5Mpa</p> <p>Temperature=4–38℃</p> <p>Influent quality=top water (GB5749)</p> <p>Purified water flow=0.09 m<sup>3</sup> h<sup>-1</sup></p> <p>Total purified water=4 m<sup>3</sup></p>   | Ultrafiltration membrane           | <p>Hollow fiber PAN</p> <p>Filtering accuracy=0.01 μm</p> <p>Pressure inlet= 0.1–1.6 Mpa</p> <p>Pressure drop ≤ 0.016 Mpa</p> <p>Effective membrane area=16 m<sup>3</sup></p>                                                                                                                                                                    |
|                                                                                                                                                                                                                                                                                           | Post activated carbon              | <p>Coconut shell activated carbon</p> <p>Filtering accuracy=5 μm</p> <p>Pressure inlet ≤ 0.4 Mpa</p> <p>Iodine adsorption value ≥ 950 mg/g</p>                                                                                                                                                                                                   |
|                                                                                                                                                                                                                                                                                           | Polypropylene cotton filter        | <p>Length=254 mm</p> <p>Filtering accuracy=10μm</p> <p>pH scope=1–13</p> <p>Pressure inlet= 0.1–0.4 Mpa</p> <p>Pressure drop ≤ 0.2 Mpa</p>                                                                                                                                                                                                       |
|                                                                                                                                                                                                                                                                                           | Sintered activated carbon          | <p>Nutshell Activated Carbon</p> <p>Length=254 mm</p> <p>Filtering accuracy=0.5 μm</p> <p>Pressure inlet ≤ 1 Mpa</p> <p>Iodine adsorption value ≥ 1200 mg/g</p>                                                                                                                                                                                  |
|                                                                                                                                                                                                                                                                                           | Nanofiltration membrane            | <p>SNF</p> <p>Filtering accuracy=1 nm</p> <p>Pressure inlet= 0.5–2.0 Mpa</p>                                                                                                                                                                                                                                                                     |
| <p>Reverse osmosis water purifier from manufacturer A</p> <p>Stages=4</p> <p>Pressure inlet= 0.1–0.4Mpa</p> <p>Temperature=4–38℃</p> <p>Influent quality=top water (GB5749)</p> <p>Purified water flow=0.063 m<sup>3</sup> h<sup>-1</sup></p> <p>Total purified water=5 m<sup>3</sup></p> | Post activated carbon              | <p>Coconut shell activated carbon</p> <p>Length=254 mm</p> <p>Filtering accuracy=5 μm</p> <p>Pressure inlet ≤ 0.4 Mpa</p> <p>Iodine adsorption value ≥ 1000 mg/g</p>                                                                                                                                                                             |
|                                                                                                                                                                                                                                                                                           | Polypropylene cotton filter        | <p>Length=254 mm</p> <p>Filtering accuracy=10 μm</p> <p>pH scope=1–13</p> <p>Pressure inlet= 0.1–0.4 Mpa</p> <p>Pressure drop ≤ 0.2 Mpa</p>                                                                                                                                                                                                      |
|                                                                                                                                                                                                                                                                                           | Composite ultrafiltration membrane | <p>Hollow fiber PAN</p> <p>Filtering accuracy=0.01 μm</p> <p>Pressure inlet= 0.1–1.6 Mpa</p> <p>Pressure drop ≤ 0.016 Mpa</p> <p>Effective membrane area=12 m<sup>3</sup></p> <p>Nutshell Activated Carbon</p> <p>Length=100 mm</p> <p>Filtering accuracy=0.5 μm</p> <p>Pressure inlet ≤ 0.68 Mpa</p> <p>Iodine adsorption value ≥ 1200 mg/g</p> |
|                                                                                                                                                                                                                                                                                           | Reverse                            | Polyacrylamide                                                                                                                                                                                                                                                                                                                                   |
|                                                                                                                                                                                                                                                                                           |                                    |                                                                                                                                                                                                                                                                                                                                                  |

|                          |                                                                                                                                                |
|--------------------------|------------------------------------------------------------------------------------------------------------------------------------------------|
| osmosis<br>membrane      | Filtering accuracy=0.1 nm<br>Pressure inlet= 1–5 Mpa                                                                                           |
| Post activated<br>carbon | Coconut shell activated carbon<br>Filtering accuracy=5 $\mu$ m<br>Pressure inlet $\leq$ 0.4 Mpa<br>Iodine adsorption value $\geq$ 1000<br>mg/g |

**Table S3.** Spatial and temporal distribution of As in drinking water in each district.

|                            | Districts | Arithmetic<br>mean(ug/L) | Maximum(ug/L) | minimum(ug/L) | Relative<br>deviation(%) |
|----------------------------|-----------|--------------------------|---------------|---------------|--------------------------|
| Jinze Reservoir            | Fengxian  | 0.406                    | 0.725         | 0.123         | 0.248                    |
|                            | Fengxian  | 0.789                    | 0.955         | 0.550         | 0.171                    |
|                            | Jinshan   | 0.940                    | 1.195         | 0.721         | 0.240                    |
|                            | Jinshan   | 0.911                    | 1.032         | 0.790         | 0.105                    |
| Qingcaosha                 | Yangpu    | 0.269                    | 0.393         | 0.112         | 0.121                    |
|                            | Yangpu    | 0.557                    | 0.652         | 0.432         | 0.100                    |
|                            | Jing'an   | 0.417                    | 0.605         | 0.263         | 0.175                    |
|                            | Jing'an   | 0.399                    | 0.954         | 0.162         | 0.375                    |
|                            | Pudong    | 0.309                    | 0.416         | 0.246         | 0.078                    |
|                            | Pudong    | 0.329                    | 0.412         | 0.272         | 0.064                    |
|                            | Huangpu   | 0.390                    | 0.624         | 0.248         | 0.171                    |
|                            | Huangpu   | 0.429                    | 0.624         | 0.248         | 0.181                    |
| Chenhang<br>Reservoir      | Baoshan   | 0.531                    | 0.956         | 0.333         | 0.291                    |
|                            | Baoshan   | 0.619                    | 0.829         | 0.239         | 0.260                    |
| Dongfengxisha<br>Reservoir | Chongming | 0.238                    | 0.952         | 0.000         | 0.476                    |
|                            | Chongming | 0.139                    | 0.554         | 0.000         | 0.277                    |

**Table S4** Concentrations of total arsenic in drinking water and in the effluent of water purifiers in each district ( $\mu\text{g L}^{-1}$ ).

| Districts | Tap water | After RO<br>processing | After NF<br>processing | After UF<br>processing |
|-----------|-----------|------------------------|------------------------|------------------------|
| Fengxian  | 0.825     | 0.286                  | 0.247                  | 0.685                  |
| Jinshan   | 1.195     | 0.387                  | 0.324                  | 0.904                  |
| Yangpu    | 0.652     | 0.194                  | 0.125                  | 0.482                  |
| Jing'an   | 1.168     | 0.299                  | 0.207                  | 0.929                  |
| Pudong    | 0.315     | <0.09                  | <0.09                  | 0.248                  |
| Huangpu   | 0.248     | <0.09                  | <0.09                  | 0.154                  |
| Baoshan   | 0.879     | 0.249                  | 0.207                  | 0.612                  |
| Chongming | <0.09     | <0.09                  | <0.09                  | <0.09                  |

Note: The limit of detection for total arsenic determination by ICP-MS is  $0.09\mu\text{g L}^{-1}$ . For calculating the health risk for values below the limit of detection,  $0.09/2 = 0.045\mu\text{g L}^{-1}$  was chosen for calculation.
